# Supplementary material for: Dynamics of the Eukaryotic Replicative Helicase at Lagging-Strand Protein Barriers Support the Steric Exclusion Model
Source: PubMed Central journal article supplement (PMC6381796; doi:10.1016/j.celrep.2019.01.086), 2019-02-19
Supplement: mmc1.pdf [file mmc1.pdf]

**Cell Reports, Volume 26**

**Supplemental Information**

**Dynamics of the Eukaryotic Replicative Helicase**

**at Lagging-Strand Protein Barriers**

**Support the Steric Exclusion Model**

**Hazal B. Kose, Nicolai B. Larsen, Julien P. Duxin, and Hasan Yardimci**

**Figure S1**

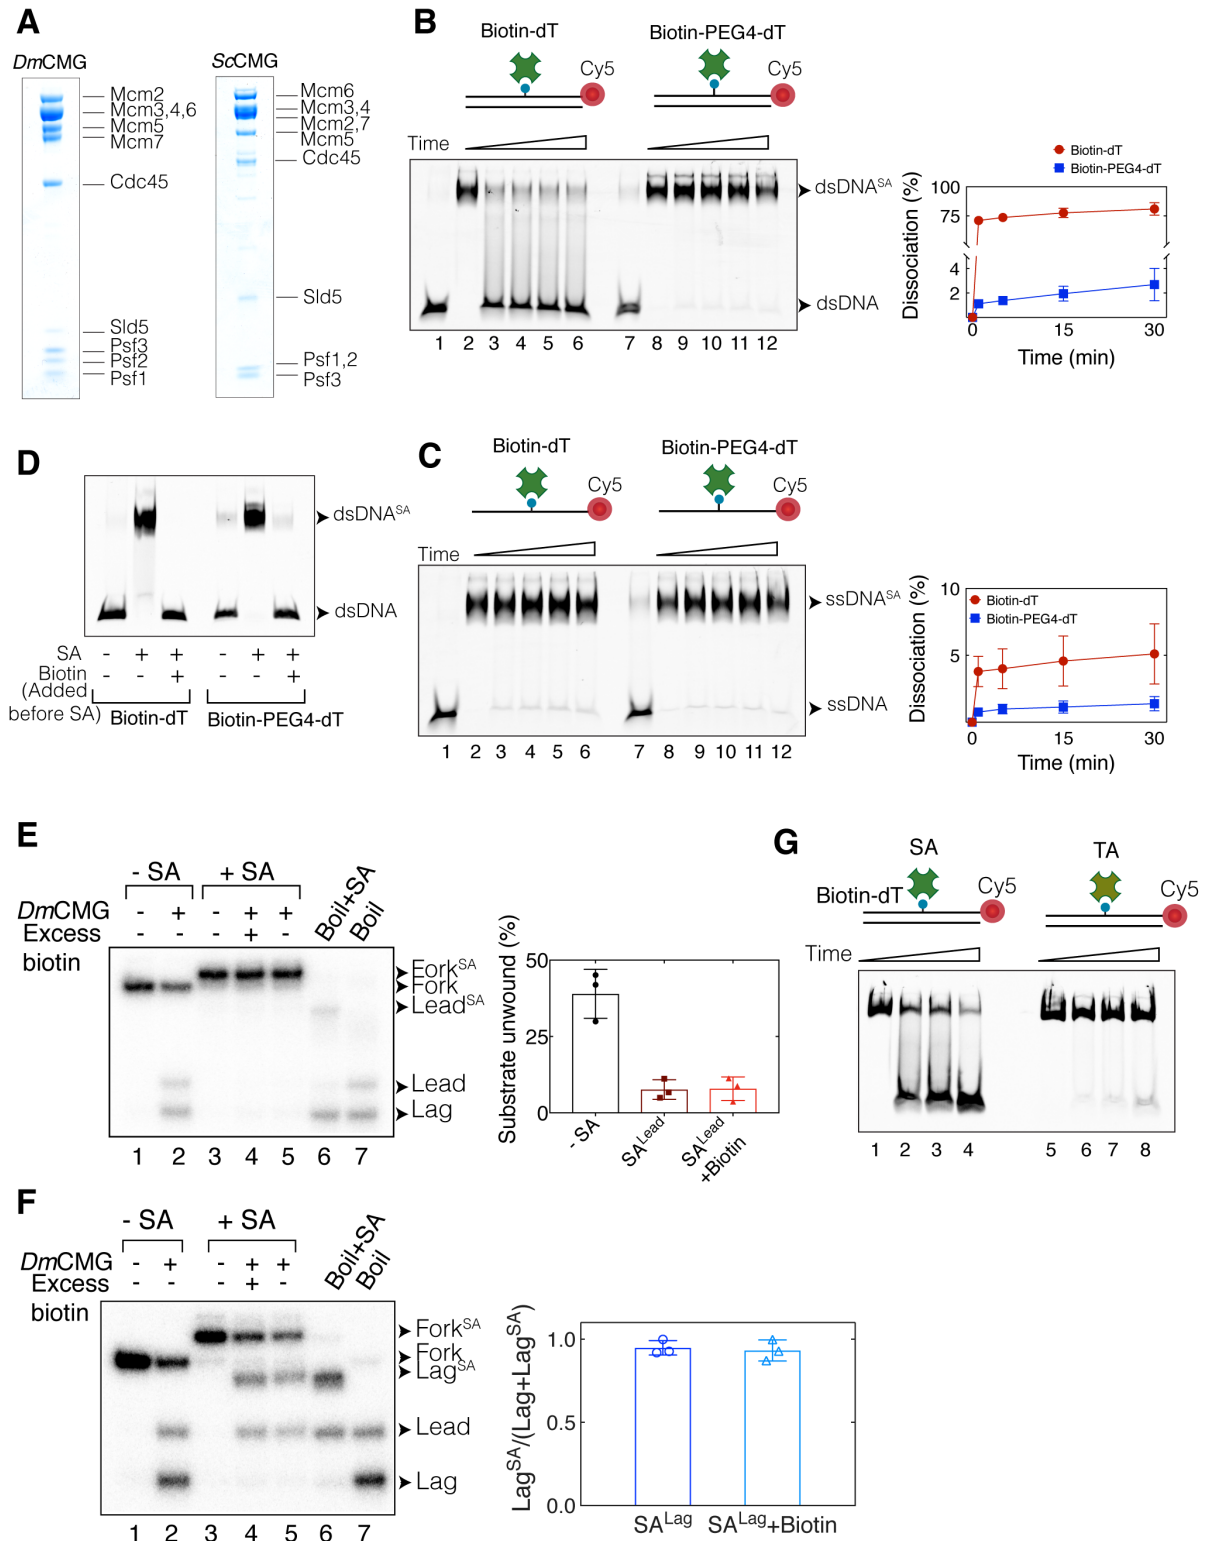

**Figure S1. Recombinant CMG complexes and stability of biotin-streptavidin complex on DNA, Related to Figure 1.**

(A) Purified recombinant *Dm*CMG and *Sc*CMG complexes were separated on 4-12% SDS polyacrylamide gels and stained with coomassie blue.

(B and C) Gel images showing spontaneous dissociation of SA from (B) dsDNA or (C) ssDNA containing either an internal biotin-dT (lanes 1-6) or biotin-PEG4-dT (lanes 7-12). DNA was labelled with Cy5 at the 3' end of the biotin-modified strand. Right panels show the extent of SA dissociation at indicated time points upon incubation at 30°C with excess biotin. Samples in lane 1 and 7 do not include SA, in lanes 2 and 8 contain SA but not biotin. Lanes 3-6 and 9-12 correspond to 1, 5, 15, and 30 min of biotin incubation after SA binding. Each reaction included final concentrations of 0.5 mg/ml SA and 80  $\mu$ M biotin. Data represented here are mean $\pm$ SD from three independent experiments. Spontaneous SA dissociation in the presence of free biotin is greatly enhanced when the biotin-modified strand is annealed to its complementary strand suggesting that base pairing weakens the bio-SA interaction.

(D) SA failed to bind biotinylated duplex DNA templates when biotin was added before SA.

(E) *Dm*CMG-mediated unwinding of fork DNA modified with SA<sup>Lead</sup> in the presence (lane 4) or absence (lane 5) of free biotin. Percentage of substrate unwound under different conditions is shown on the right panel. While SA<sup>Lead</sup> almost completely inhibited unwinding, addition of excess free biotin did not increase the unwinding efficiency.

(F) *Dm*CMG-dependent unwinding of fork DNA modified with SA<sup>Lag</sup> in the presence (lane 4) or absence (lane 5) of free biotin. The right panel shows the relative amount of SA-bound lagging-strand template (Lag<sup>SA</sup>) with respect to total amount of lagging-strand template (Lag+Lag<sup>SA</sup>) in the absence (lane 5) or presence (lane 4) of excess biotin. Each reaction contained 75 nM *Dm*CMG. Data represented here are mean $\pm$ SD from three independent experiments.

(G) Spontaneous dissociation of SA (SA) or traptavidin (TA) from dsDNA containing an internal biotin-dT. Reactions in lanes 1 and 5 did not include excess biotin, while the rest contained 80  $\mu$ M biotin. After addition of biotin, DNA was incubated at 30°C for 5, 15, or 30 min.

**Figure S2**

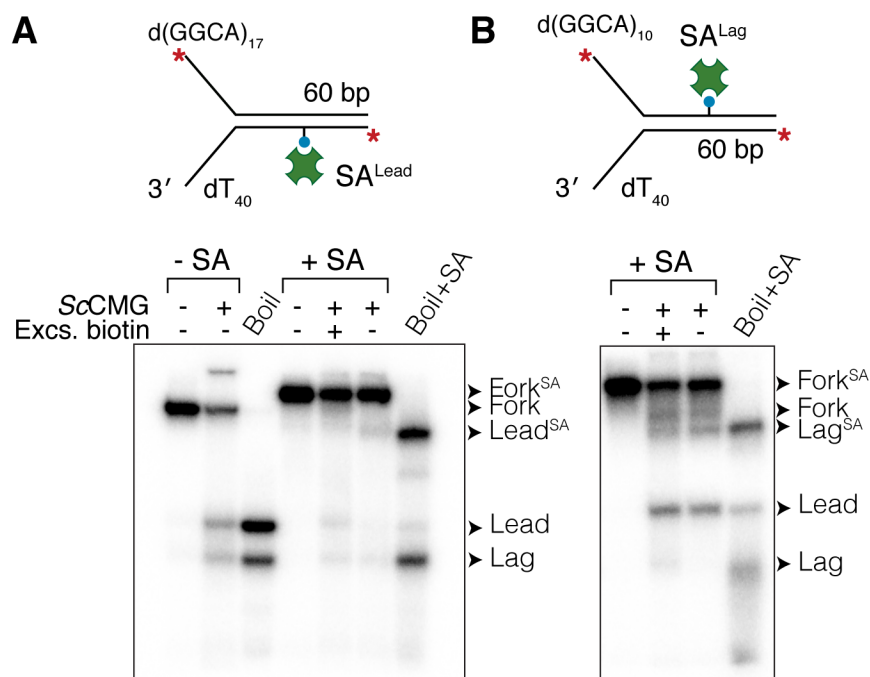

**Figure S2. ScCMG Does Not Displace Streptavidin from the Lagging-Strand Template, Related to Figure 2.**

(A and B) ScCMG-catalyzed unwinding of fork DNA templates containing (A) SA<sup>Lead</sup> or (B) SA<sup>Lag</sup> in the absence or presence of excess biotin. Intensity of the band corresponding to SA-bound lagging strand (Lag<sup>SA</sup>) did not significantly change upon addition of excess biotin. The slight increase in streptavidin-free lagging strand-template (Lag) is most likely due to spontaneous dissociation of SA from fork DNA when challenged with free biotin. Fork substrates were labelled at both 5'-ends with <sup>32</sup>P. The radiolabel is shown as a red asterisk.

**Figure S3**

**A**

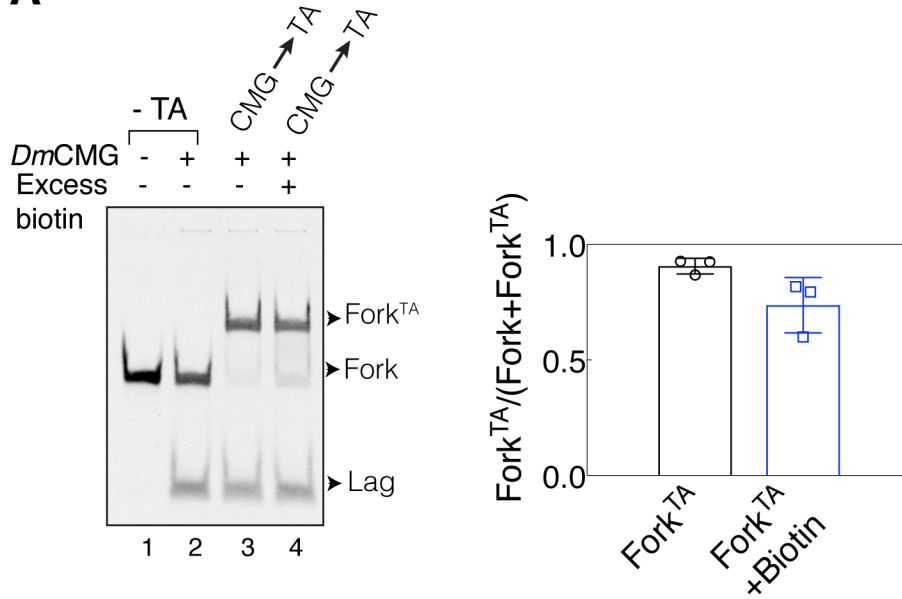

**B**

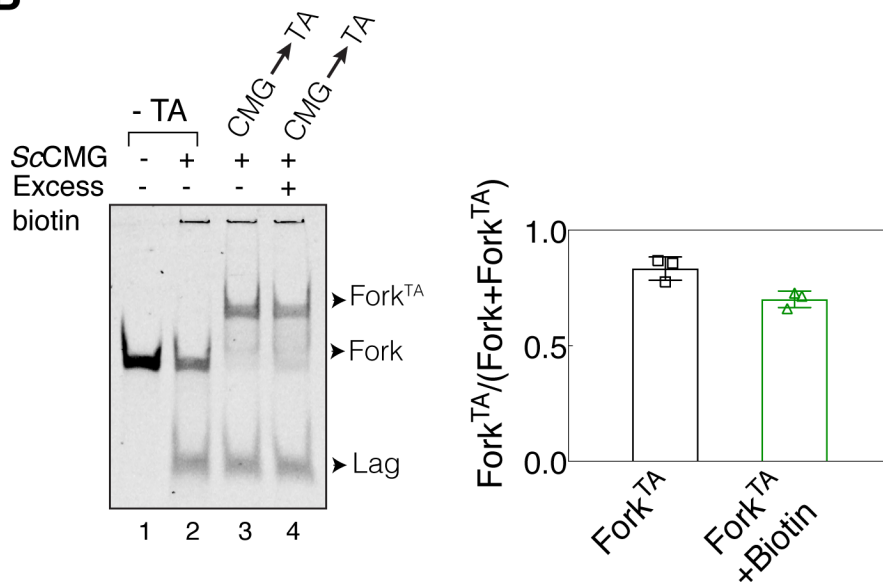

**Figure S3. Traptavidin Efficiently Binds to CMG-Bound Fork DNA, Related to Figure 3.**

(A and B) Unwinding of fork DNA bearing biotin-dT-TA<sup>Lag</sup> by (A) *DmCMG* or (B) *ScCMG* in the absence (lane 3) or presence (lane 4) of excess biotin. Right panels show the fraction of fork DNA bound to TA (as measured by  $\text{Fork}^{\text{TA}}/(\text{Fork}^{\text{TA}}+\text{Fork})$ ) in the absence or presence of excess biotin. Addition of free biotin leads to only a minor decrease in the amount of TA-bound DNA most likely due the dissociation of TA. Data represented here are mean $\pm$ SD from three independent experiments.

## Figure S4

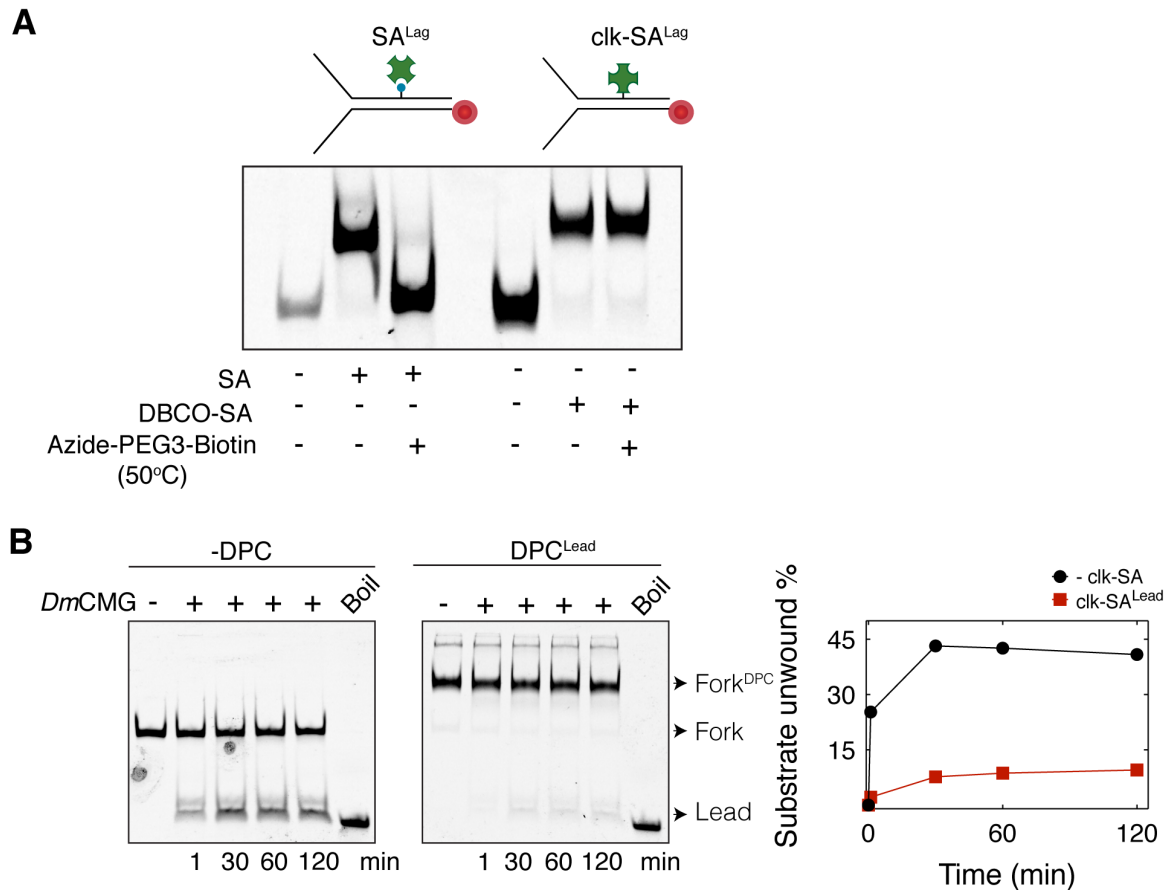

**Figure S4. *DmCMG* Cannot Efficiently Bypass DPC<sup>Lead</sup> After Extended Periods of Time, Related to Figure 4.**

(A) Stability of SA bound to Cy5-labeled fork DNA via biotin or covalently through copper-free click chemistry is measured by incubation at 50°C for 10 min in the presence of a bifunctional reagent, azide-PEG3-biotin, that competes with biotin and azide on DNA substrates.

(B) Time-course unwinding assays on unmodified and clk-SA<sup>Lead</sup>-modified fork templates in the presence of 50 nM *DmCMG*. Right panel shows percentage of unwound substrate in the absence or presence of clk-SA<sup>Lead</sup> plotted against time.

**Figure S5**

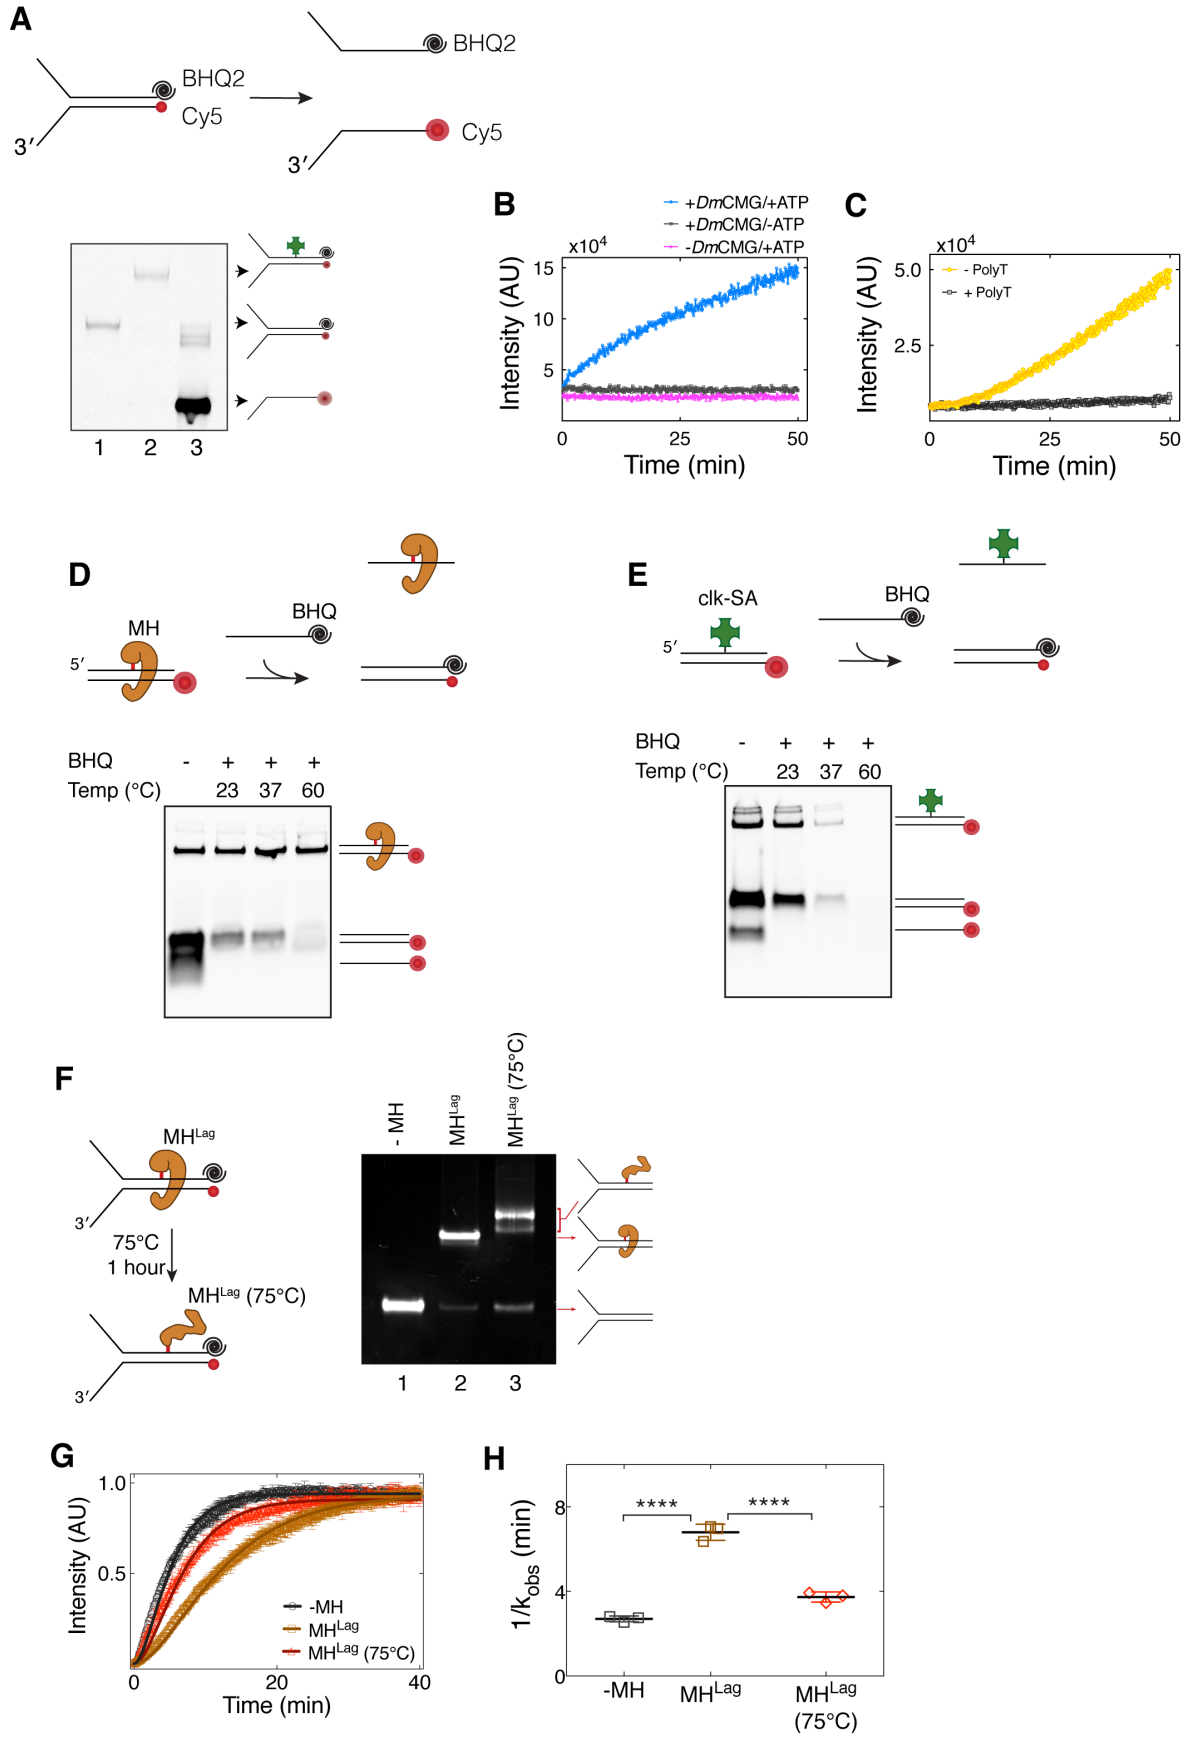

**Figure S5. Stalling of *Dm*CMG is Alleviated Upon Unfolding of MH<sup>Lag</sup>, Related to Figure 5.**

(A) Schematic representation of Cy5 fluorescence enhancement by conversion of dsDNA to ssDNA. (Lower panel) Naked (lane 1) and clk-SA<sup>Lag</sup>-modified (lane 2) fork DNA containing Cy5 and BHQ2 on opposite strands were separated on native polyacrylamide gel. Upon heat denaturation of dsDNA, Cy5-modified strand exhibits higher fluorescence (lane 3).

(B) *Dm*CMG was pre-incubated with labelled fork DNA in the presence of ATP $\gamma$ S for 120 min. Unwinding was initiated by addition of ATP. Fluorescence time course exhibits intensity increase in the presence of *Dm*CMG and ATP (blue) indicating helicase-dependent fork unwinding. Omission of *Dm*CMG (pink) or ATP (black) results in no change in fluorescence as expected.

(C) When *Dm*CMG is mixed with fork DNA and ATP without pre-loading onto fork, a lag period in fluorescence signal increase, during which CMG binds to DNA, is observed (yellow). Presence of 40-nt poly-T oligonucleotide (1.5  $\mu$ M final) in this assay prevents CMG to bind fork DNA substrate and subsequent unwinding (black).

(D and E) Thermal stability of duplex DNA substrates bearing (D) MH or (E) clk-SA. Substrates were incubated in the absence (lane 1) or presence (2, 3, and 4) of BHQ-labelled competitor oligo at indicated temperatures for 20 min. Melting of duplex DNA leads to liberation of the Cy5-labelled strand, its hybridization to the BHQ-labelled strand upon cooling, and disappearance of the fluorescent band.

(F) A schematic representation of MH<sup>Lag</sup> unfolding upon 75°C treatment. On the right, naked (lane 1), MH<sup>Lag</sup>-modified (lane 2), and heat-treated MH<sup>Lag</sup>-modified (lane 3) fork DNA substrates were separated on native 8% polyacrylamide gel. Upon heat treatment, most DNA contained unfolded MHpall (lane 3).

(G) Single turn-over fluorescence-unwinding assays performed with denatured-MH<sup>Lag</sup> fork substrate (red) showed significantly less delay compared to substrates with native MH<sup>Lag</sup> (brown). Unwinding kinetics of substrate lacking MH is shown in black. Solid lines represent fits to the Equation 2 (STAR Methods).

(H) Observed unwinding rate constants of substrates from (G). Data represented here are mean $\pm$ SD from three independent experiments. \*p < 0.05, \*\*p < 0.01, \*\*\*p < 0.001.



**Figure S6**

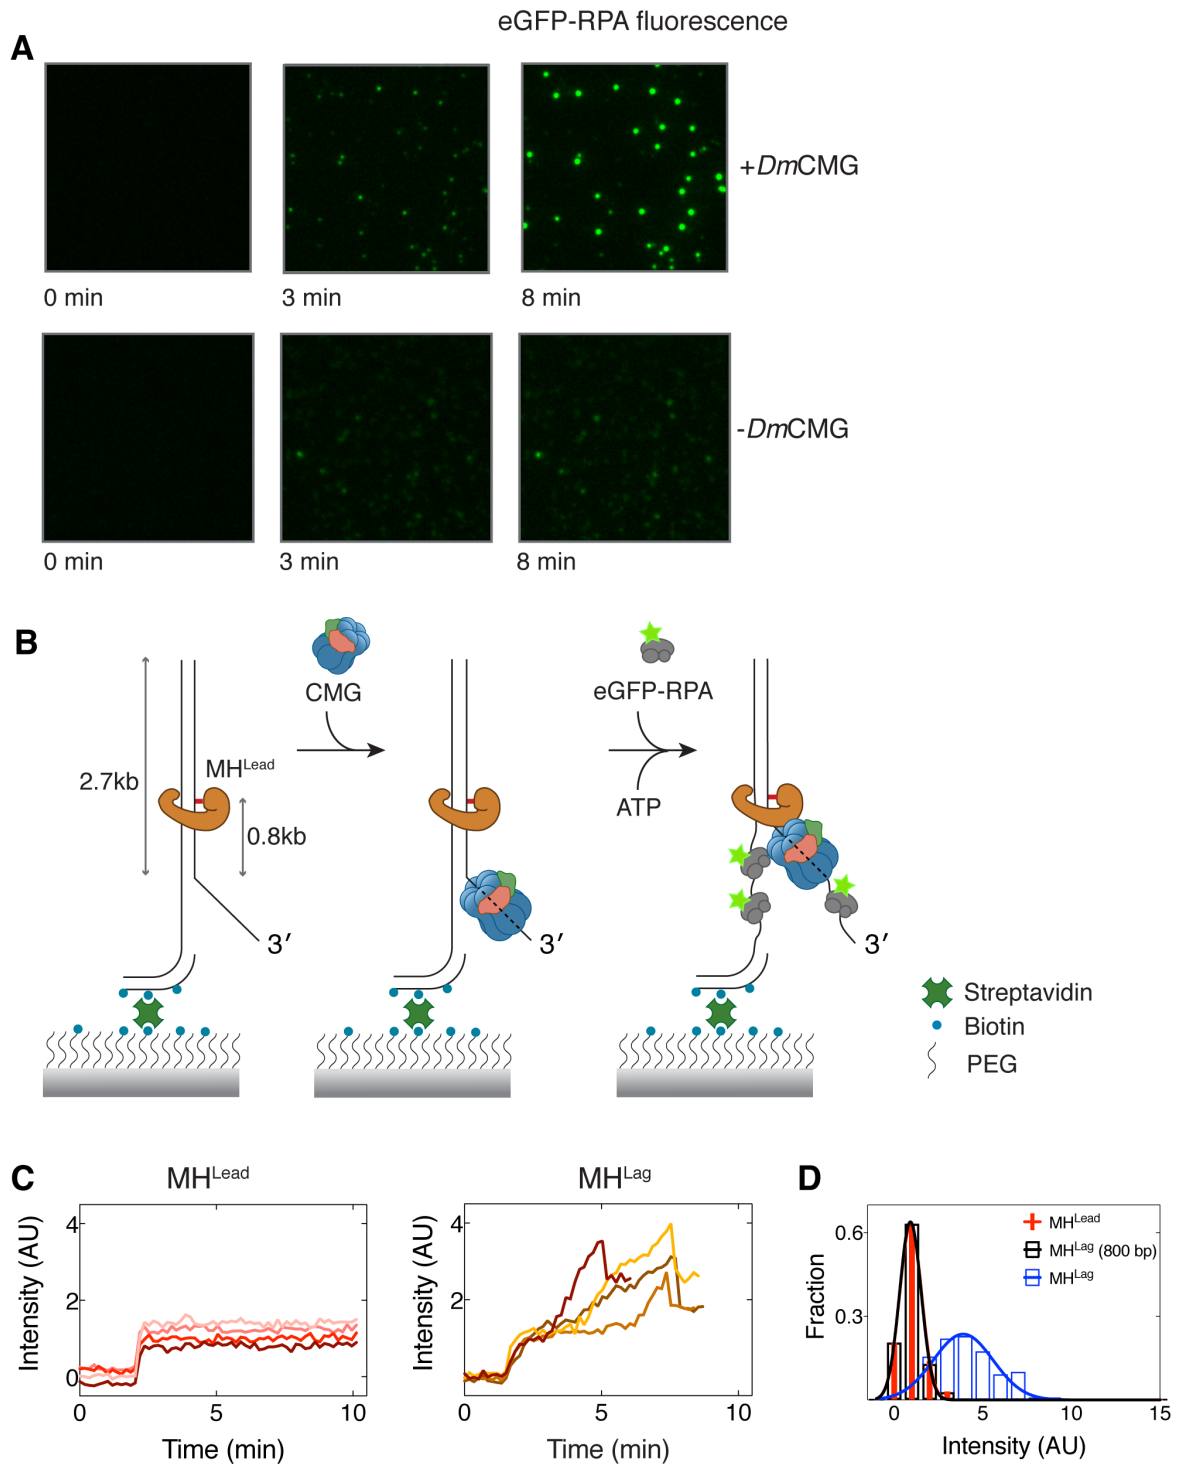

**Figure S6. Fluorescence Signal Accumulation is Unwinding-Dependent, Related to Figure 6.**

(A) Fluorescence images of a sample field of view at different time points showing accumulation of eGFP-RPA signal in the presence (top row) and absence (bottom row) of pre-incubation with *DmCMG*. Time points are from the addition of eGFP-RPA into the flow chamber.

(B) Schematic representation of experimental approach with DNA substrate bearing MH on the leading-strand template ( $MH^{Lead}$ ).

(C) Example unwinding traces of substrates with  $MH^{Lead}$  (left) or  $MH^{Lag}$  (right). Traces reach plateau upon reaching  $MH^{Lead}$  as CMG stops unwinding (depicted in B).

(D) Distribution of intensity levels measured at the peak point on fully unwound substrates with  $MH^{Lead}$  (red) and  $MH^{Lag}$  (blue), or at the transient stalling region in  $MH^{Lag}$  substrates (black). Average fluorescence accumulation on fully unwound  $MH^{Lag}$ -modified DNA is approximately  $\sim 3.3$ -fold higher than that on substrates with  $MH^{Lead}$ . Number of molecules are  $n(MH^{Lag})=109$ ,  $n(MH^{Lead})=39$ ,  $n(MH^{Lag}$  until pause)=13.

**Figure S7**

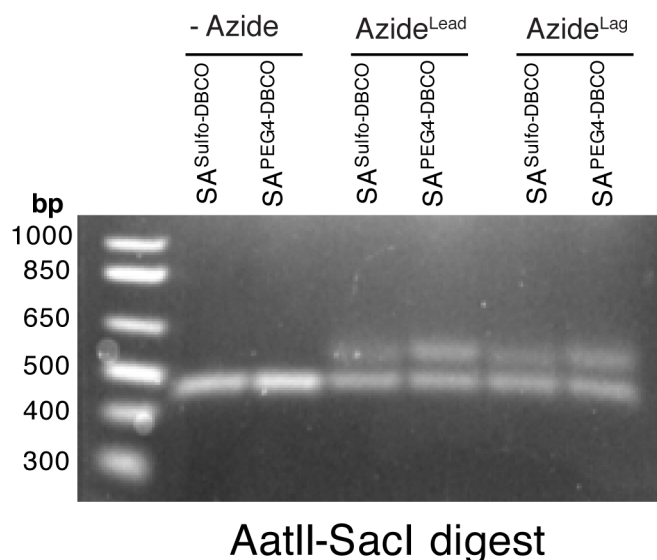

**Figure S7. Covalent Conjugation of SA to Plasmid DNA, Related to Figure 7.**

Azide-modified plasmid was crosslinked to SA that was functionalized either with DBCO-sulfo-NHS or DBCO-PEG4-NHS. To measure the crosslinking efficiency, plasmid was digested with AatII and SacI freeing a 500 bp fragment containing the modified base. SA functionalized with DBCO-PEG4 led to approximately 50% crosslinking efficiency of plasmids containing azide on either the leading- or the lagging-strand templates. Because SA modified with DBCO-sulfo was less proficient in click conjugation, we used plasmids containing SA with DBCO-PEG4 in replication assays.



|          |                                                                                                                                                                |
|----------|----------------------------------------------------------------------------------------------------------------------------------------------------------------|
| oligo-11 | TTTACAACGTCGTGCTGAGGTACCGGATGCTGAGGCAATGGGAATTCGCC                                                                                                             |
| Oligo-12 | ATGCCGGGAGCAGACAAGCCCGTC                                                                                                                                       |
| Oligo-13 | TTTCTTGTATAGCAGTGCAGCTTT                                                                                                                                       |
| Oligo-14 | GGCTTACATTTTTTTT                                                                                                                                               |
| Oligo-15 | GGCAAGAGCAACTCGGTCGCCGCATACACTATTCTCAGAATGACTTGGTTAT<br>GTAAGCC                                                                                                |
| Oligo-16 | AACCAAGTCATTCTGAGAATAGTGTATGCGGCGACCGAGTTGCTCTTGCCGG<br>CAGGCAGGCAGGCAGGCAGGCAGGCAGGCAGGCAGGCAGGCATGCTCTTTACAA<br>CCGGTAGACTGCTTCAGGGAACGATGTGCTGTGTACAGAGCTCC |
| Oligo-17 | GTACACAGCACATCGTTCCTGAAGCAGTCTACCGGTTGTAAAGAGCATTTT<br>TTTTTTTTTTTTTTTTTTTTTTTTTTTTTTTTTTTTTTTTTTTTTTTTTTTTTTTT<br>TTTTTTTT                                    |
| Oligo-18 | AGAGCTCCTCAGCGAGAGCGCACGAGGGAGC                                                                                                                                |
| Oligo-19 | TAGCGCCTCAGCCTGTTCCGACCCTGCCGCTTA                                                                                                                              |
| Oligo-20 | TAGCGCCTCAGCTCTGACAACGATCGGAGGACC                                                                                                                              |
| Oligo-21 | AGAGCTCCTCAGCAGTAAGTTGGCCGCAGTGTTATCAC                                                                                                                         |
| Oligo-22 | TTTTTTTGGAGCTCT                                                                                                                                                |
| Oligo-23 | TTTTTTGGCGCTA                                                                                                                                                  |

**Table S2. Composition of DNA substrates and figures associated with each substrate. Related to STAR Methods.**

| <b>Substrate Name</b>                                 | <b>Oligonucleotides</b>                                                                                                    | <b>Associated Figures</b> |
|-------------------------------------------------------|----------------------------------------------------------------------------------------------------------------------------|---------------------------|
| Fork-biotin-PEG4 <sup>Lead</sup><br>(Radiolabelled)   | Oligo-1 and Oligo-amn-1                                                                                                    | Figures 1, 2, S1, and S2  |
| Fork-biotin-PEG4 <sup>Lag</sup><br>(Radiolabelled)    | Oligo-2 and Oligo-amn-2                                                                                                    | Figures 1, 2, S1, and S2  |
| Fork-biotin <sup>Lag</sup><br>(Cy5 labelled)          | Oligo-bio-1 and oligo-Cy5-4                                                                                                | Figures 3 and S3          |
| Fork-biotin-PEG4 <sup>Lag</sup><br>(Cy5 labelled)     | Oligo-4, oligo-9, oligo-Cy5-3 and oligo-amn-3                                                                              | Figure S4                 |
| Fork-clk-SA <sup>Lead</sup><br>(Cy5 labelled)         | Fork end: Oligo-3 and Oligo-8. Duplex end: Oligo-Cy5- 2, Oligo-azide-2 and Oligo-7                                         | Figures 4 and S4          |
| Fork-clk-SA <sup>Lag</sup><br>(Cy5 labelled)          | Oligo-Cy5-1, Oligo-4, Oligo-azide-1 and Oligo-6                                                                            | Figures 4 and S4          |
| Fork-clk-SA <sup>Lag</sup><br>(Cy5 and BHQ2 labelled) | Oligo-Cy5-1, Oligo-4, Oligo-azide-1 and Oligo- BHQ2                                                                        | Figure 5                  |
| Fork-MH <sup>Lag</sup><br>(Cy5 and BHQ2 labelled)     | Oligo-4, Oligo-Fluo-1, Oligo-Cy5-1, Oligo-BHQ2-1                                                                           | Figure 5                  |
| 2.7 kb-MH <sup>Lag</sup><br>(Biotinylated)            | Oligo-12, Oligo-13, Oligo-14, Oligo-15, Oligo-16, Oligo-17, Oligo-18, Oligo-19, Oligo-22, Oligo-23, Oligo-Fluo-1 and pHY39 | Figure 6                  |
| 2.7 kb-MH <sup>Lead</sup><br>(Biotinylated)           | Oligo-12, Oligo-13, Oligo-14, Oligo-15, Oligo-16, Oligo-17, Oligo-20, Oligo-21, Oligo-22, Oligo-23, Oligo-Fluo-1 and pHY39 | Figure S6                 |
| Duplex-biotin<br>(Cy5 labelled)                       | Oligo-11 and oligo-bio-Cy5                                                                                                 | Figure S1                 |
| Duplex-biotin-PEG4<br>(Cy5 labelled)                  | Oligo-11 and oligo-amn-Cy5                                                                                                 | Figure S1                 |
| Duplex-5FdC<br>(Cy5 labelled)                         | Oligo-Fluo-1, Oligo-Cy5-5                                                                                                  | Figure S5                 |
| Duplex-Azide<br>(Cy5 labelled)                        | Oligo-Azide-1, Oligo-Cy5-5                                                                                                 | Figure S5                 |
